# Supplementary material
Source: PubMed Central journal article supplement (PMC3657800)
Supplement: 1220398110_pnas.201220398SI.pdf [file 1220398110_pnas.201220398SI.pdf]

# Supporting Information

Kalstrup and Blunck 10.1073/pnas.1220398110

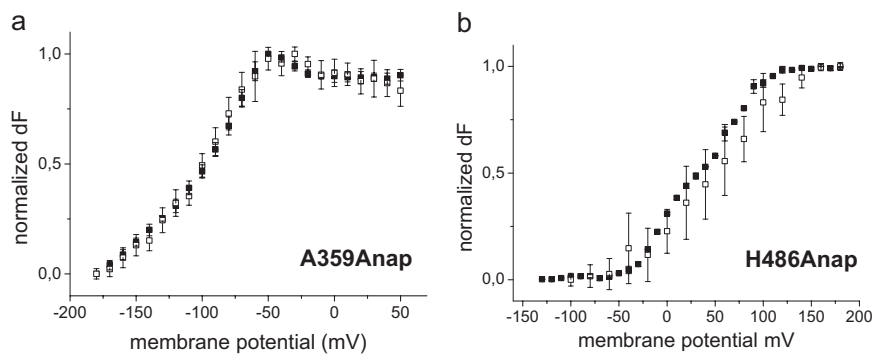

Fig. S1. Comparison of fluorescence-voltage dependencies of the conducting (open squares) and nonconducting (filled squares) mutants of A359Anap (A) and H486Anap (B).
